# Supplementary material for: Sirtuin5 contributes to colorectal carcinogenesis by enhancing glutaminolysis in a deglutarylation-dependent manner
Source: PubMed Central journal article supplement (PMC5803207; doi:10.1038/s41467-018-02951-4), 2018-02-07
Supplement: 41467_2018_2951_MOESM1_ESM.pdf [file 41467_2018_2951_MOESM1_ESM.pdf]

**a**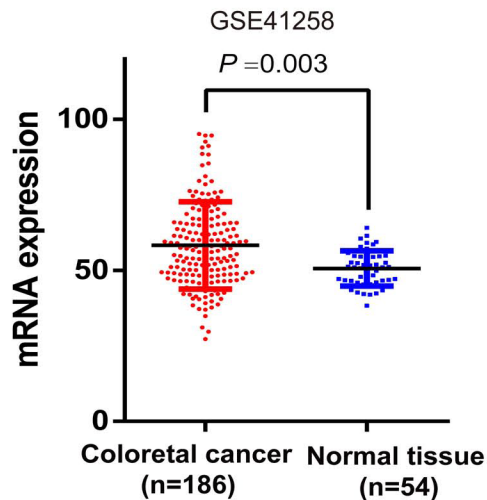**b**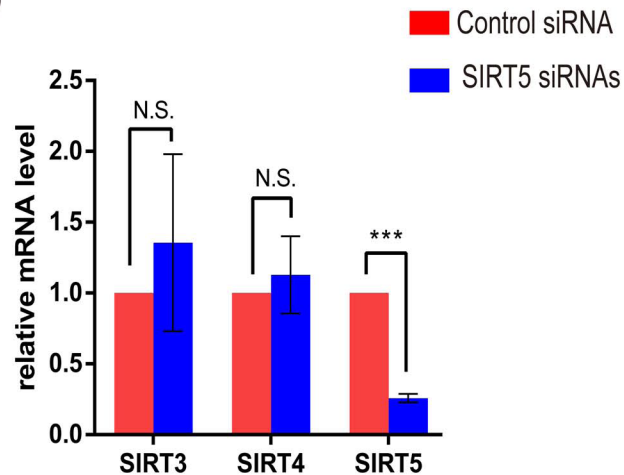

**Supplementary Figure 1.** (a) The mRNA expression of *SIRT5* was extracted from GEO data set GSE41258. The comparison between human CRC (n=186) and normal tissues (n=54) was performed using Student's t-test. Data are presented as the mean  $\pm$  SD. The *P*-values are indicated. (b) Quantitative real-time reverse transcription PCR (qRT-PCR) assay to measure the levels of three mitochondrial sirtuins (*SIRT3*, *SIRT4*, and *SIRT5*) in the absence or presence of *SIRT5* siRNAs. Data are presented as the mean  $\pm$  SD of three independent samples. Student's t-test. \*\*\* $P < 0.001$ , N.S. = not significant for the indicated comparison.

**a**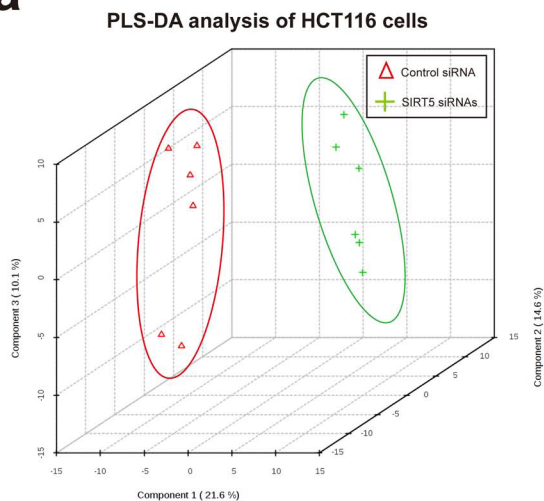**b**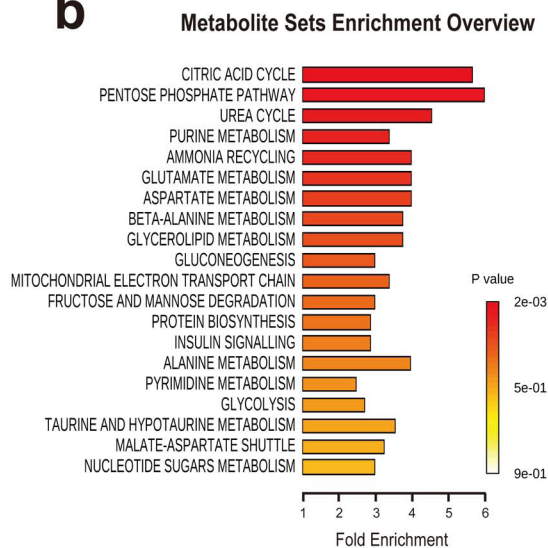**c**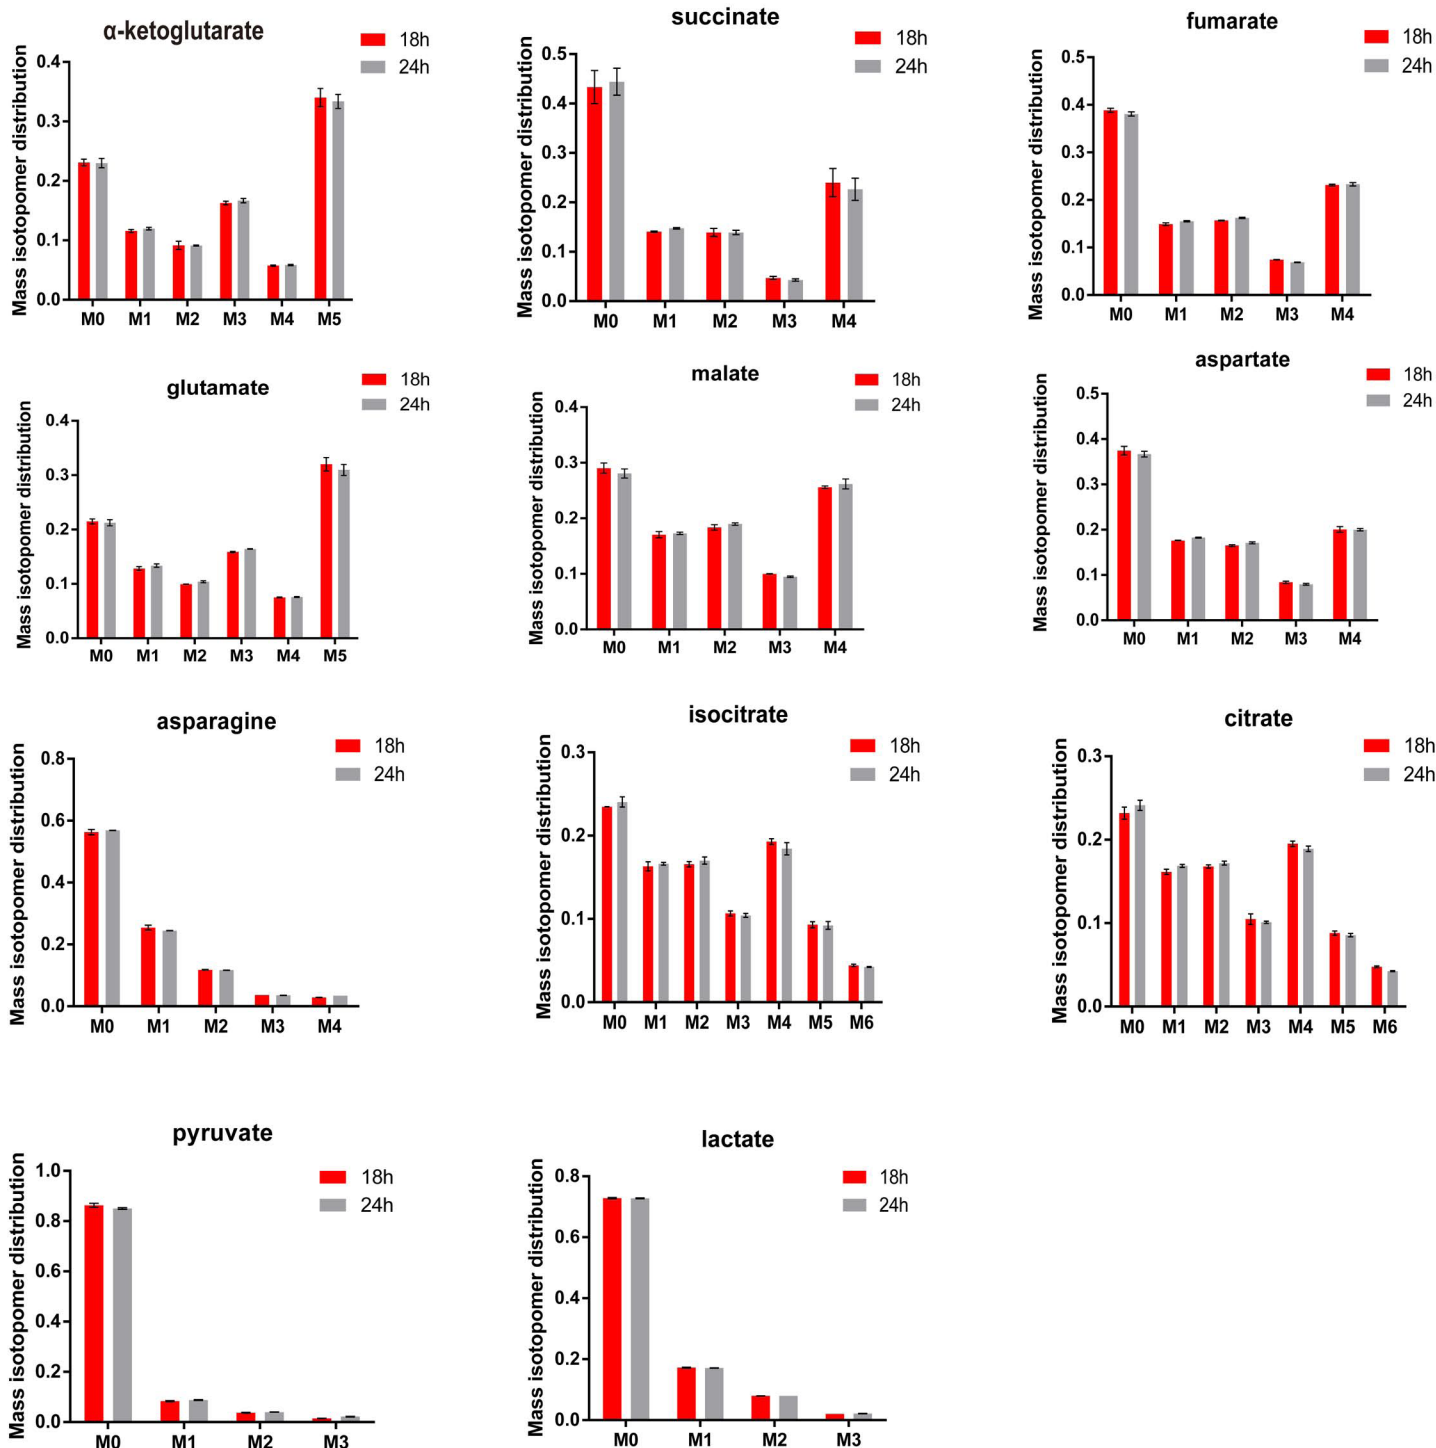

**Supplementary Figure 2.**(a) 3-D score plot of the differentially abundant metabolites classified by performing partial least squares discriminant analysis (PLS-DA) in HCT116 cells transfected with *SIRT5* siRNAs or control siRNA.  $n = 6$  samples for each condition. The PLS-DA model enables the correct classification of the samples based on the different abundances of metabolites, which allows identification of the most significant metabolites that explain the different effects of the treatments. (b) Metabolite set enrichment of the differentially abundant metabolites determined by gas chromatography-mass spectrometry (GC-MS) from HCT116 cells transfected with *SIRT5* siRNAs or control siRNA. (c) Mass isotopomer distributions (MIDs) of metabolites extracted from LoVo cells at 18 and 24h after  $[U-^{13}C_5]$  glutamine incubation, metabolites were detected by GC-MS and corrected for natural abundance. Metabolite labeling did not significantly change over the course of 18 to 24 h, indicating that the cells have achieved metabolic and isotopic steady state at the indicated time-point. Data are the mean  $\pm$  SD of three independent samples.

**a**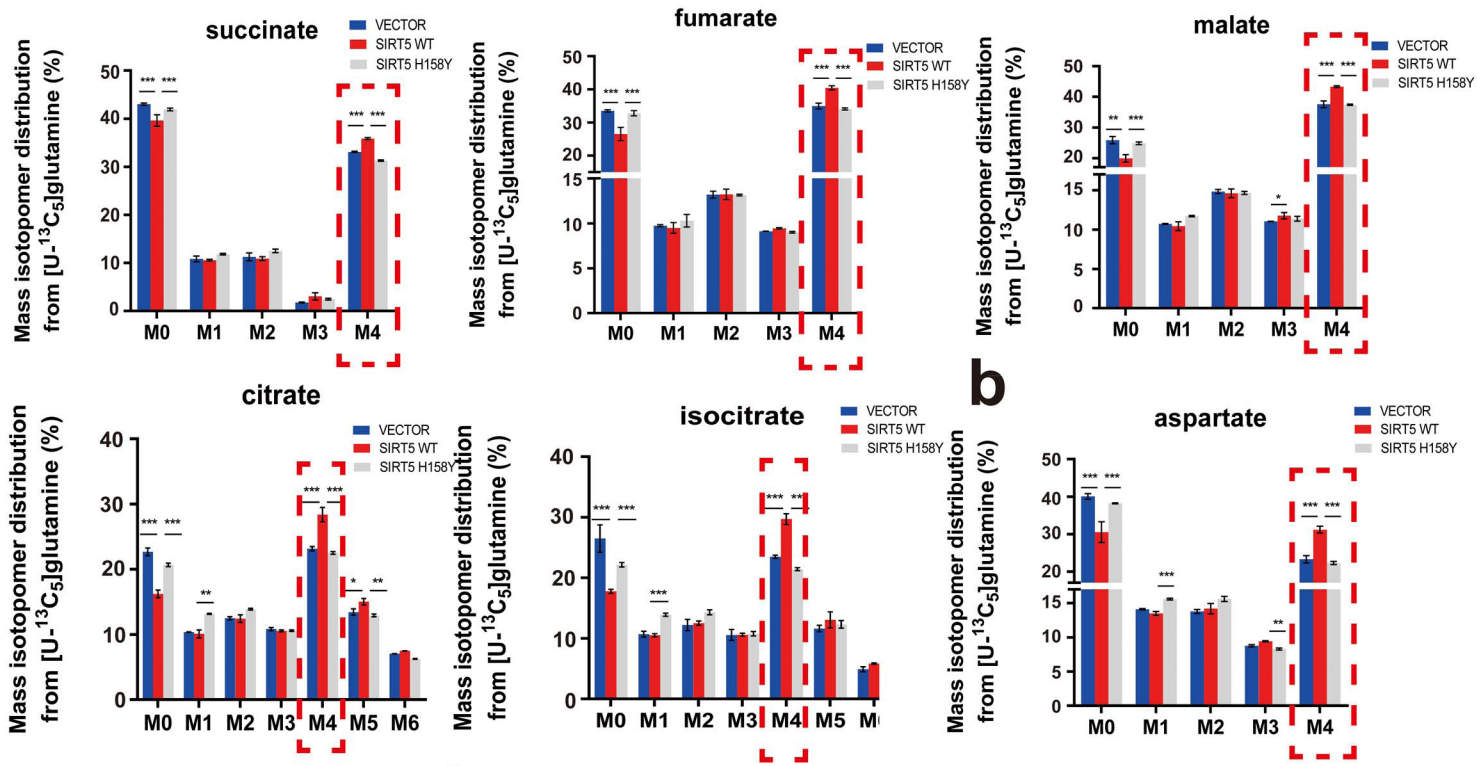**c**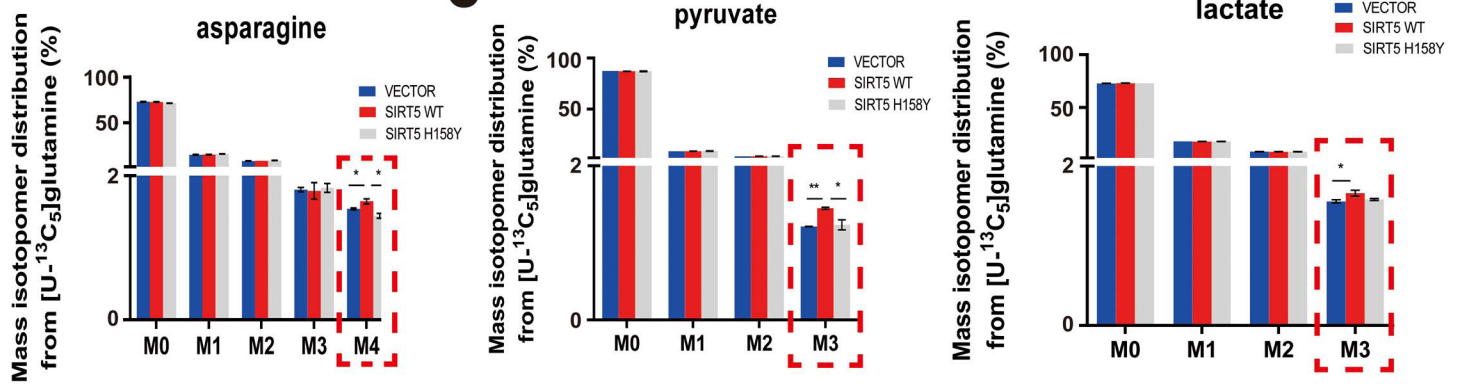**d**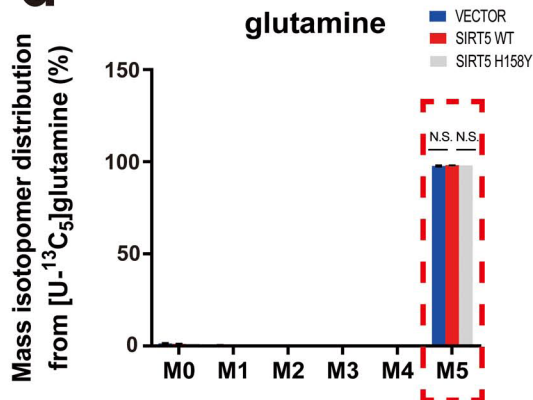

**Supplementary Figure 3.**(a)LoVo cells stably expressing the control vector, SIRT5 WT, and SIRT5 H158Y were cultured with [U-<sup>13</sup>C<sub>5</sub>] glutamine for 24h. MID<sub>s</sub> of TCA cycle metabolites extracted from cells were quantified by GC-MS.(b,c) MID<sub>s</sub> of aspartate, asparagine (b) and pyruvate, lactate (c) derived from glutamine were quantified by GC-MS.(d) Measured MID<sub>s</sub> of glutamine in LoVo cells. The fraction of m+5 glutamine indicates cellular uptake of glutamine. MID<sub>s</sub> were corrected for natural abundance. Data in a-d are the mean ± SD of three independent samples. ANOVA with Tukey's test.\**P*< 0.05, \*\**P*< 0.01, \*\*\**P*< 0.001. N.S. = not significant for the indicated comparison.

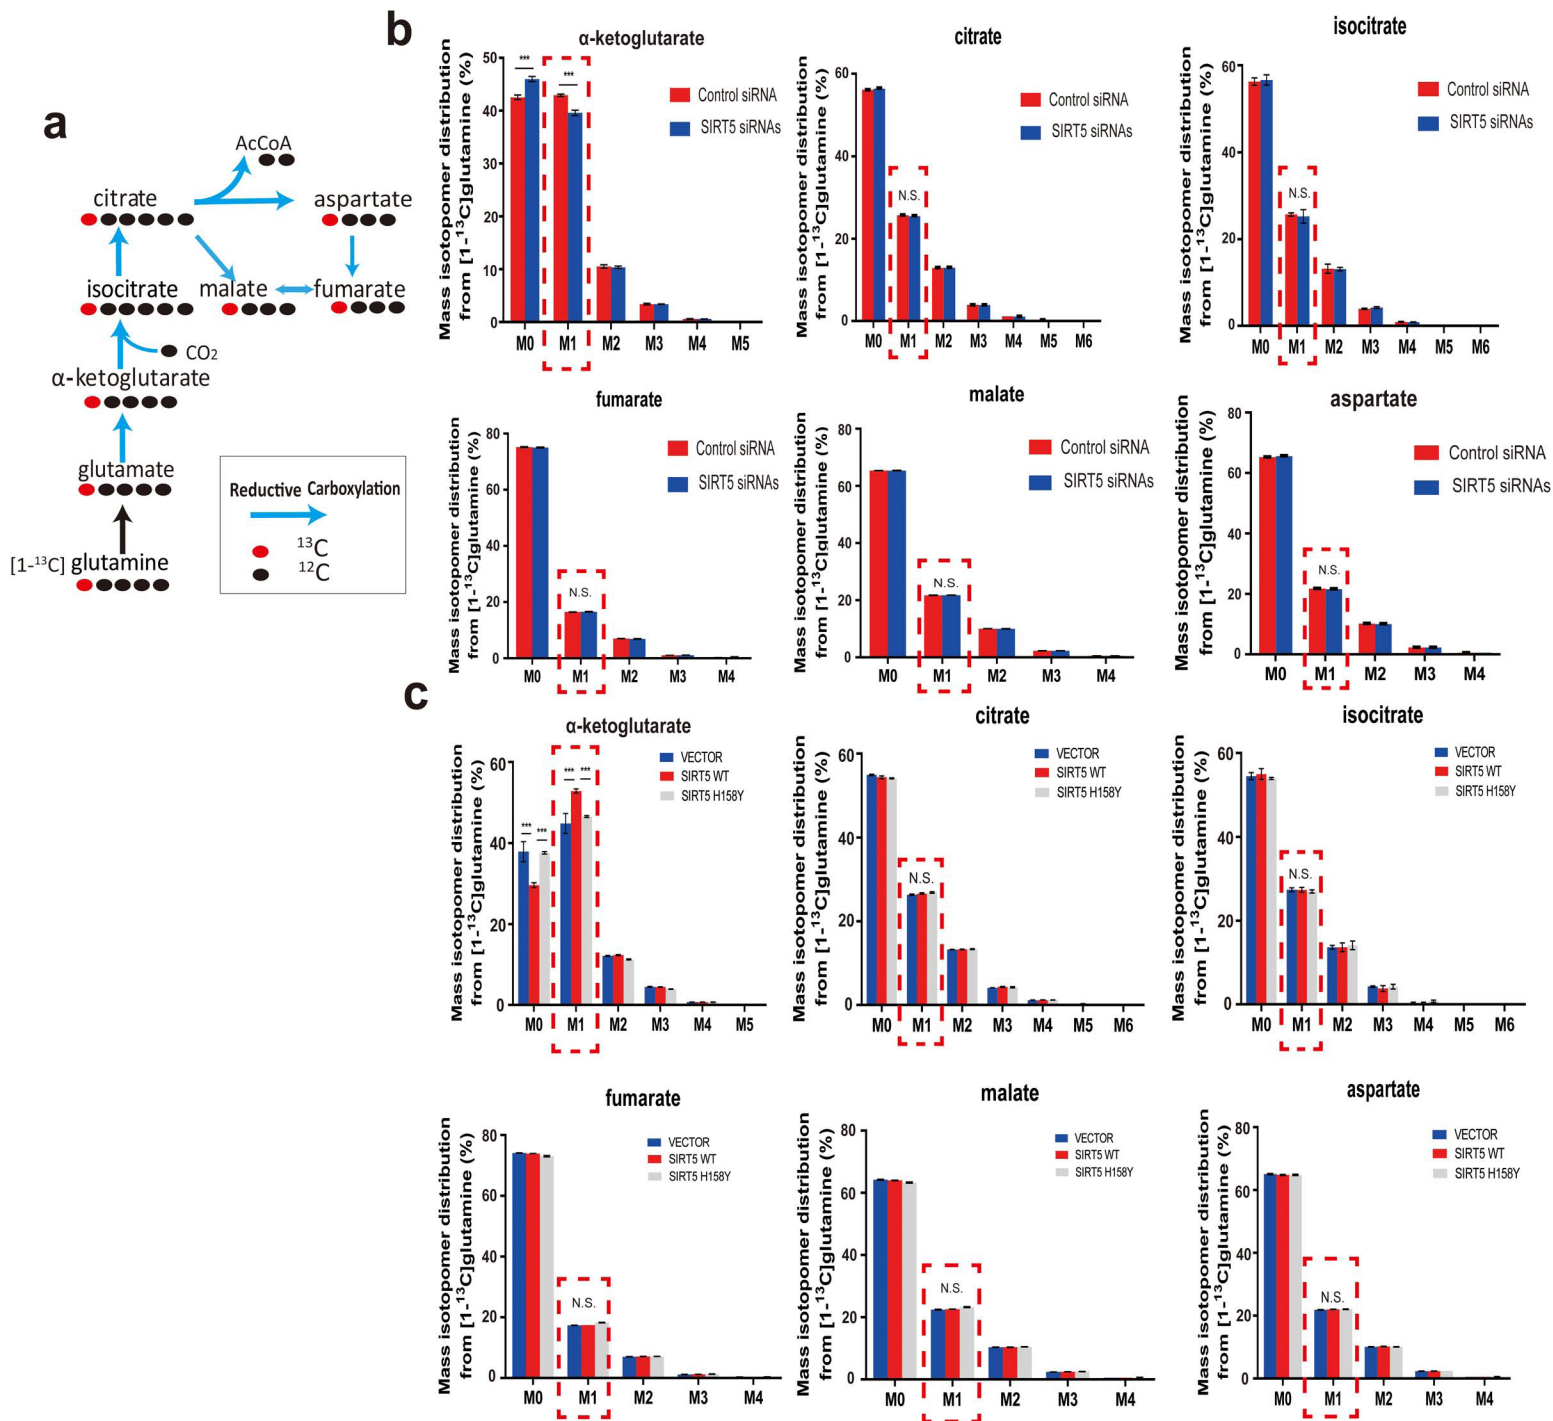

**Supplementary Figure 4.** (a) Carbon atom transition map depicting the labeling patterns of metabolites derived from  $[1-^{13}\text{C}]$  glutamine through the reductive metabolism pathway. Red circles represent carbons derived from  $[1-^{13}\text{C}]$  glutamine, and black circles are unlabeled. The blue arrows indicate reductive carboxylation flux from glutamine. (b) Mass isotopologues of  $\alpha$ -KG, fumarate, malate, citrate, isocitrate, and aspartate in SIRT5-silenced LoVo cells after culture with  $[1-^{13}\text{C}]$  glutamine for 24 h. Data are shown as the mean  $\pm$  SD.  $n=4$ . Student's  $t$ -test.  $***P < 0.001$ . N.S. = not significant for the indicated comparison. (c) Mass isotopologues of  $\alpha$ -KG, fumarate, malate, citrate, isocitrate, and aspartate in LoVo cells stably expressing control vector, SIRT5 WT, and SIRT5 H158Y after culture with  $[1-^{13}\text{C}]$  glutamine for 24 h. Data are the mean  $\pm$  SD of three independent samples.  $P$  values were calculated by ANOVA with Tukey's test.  $***P < 0.001$ . N.S. = not significant for the indicated comparison.

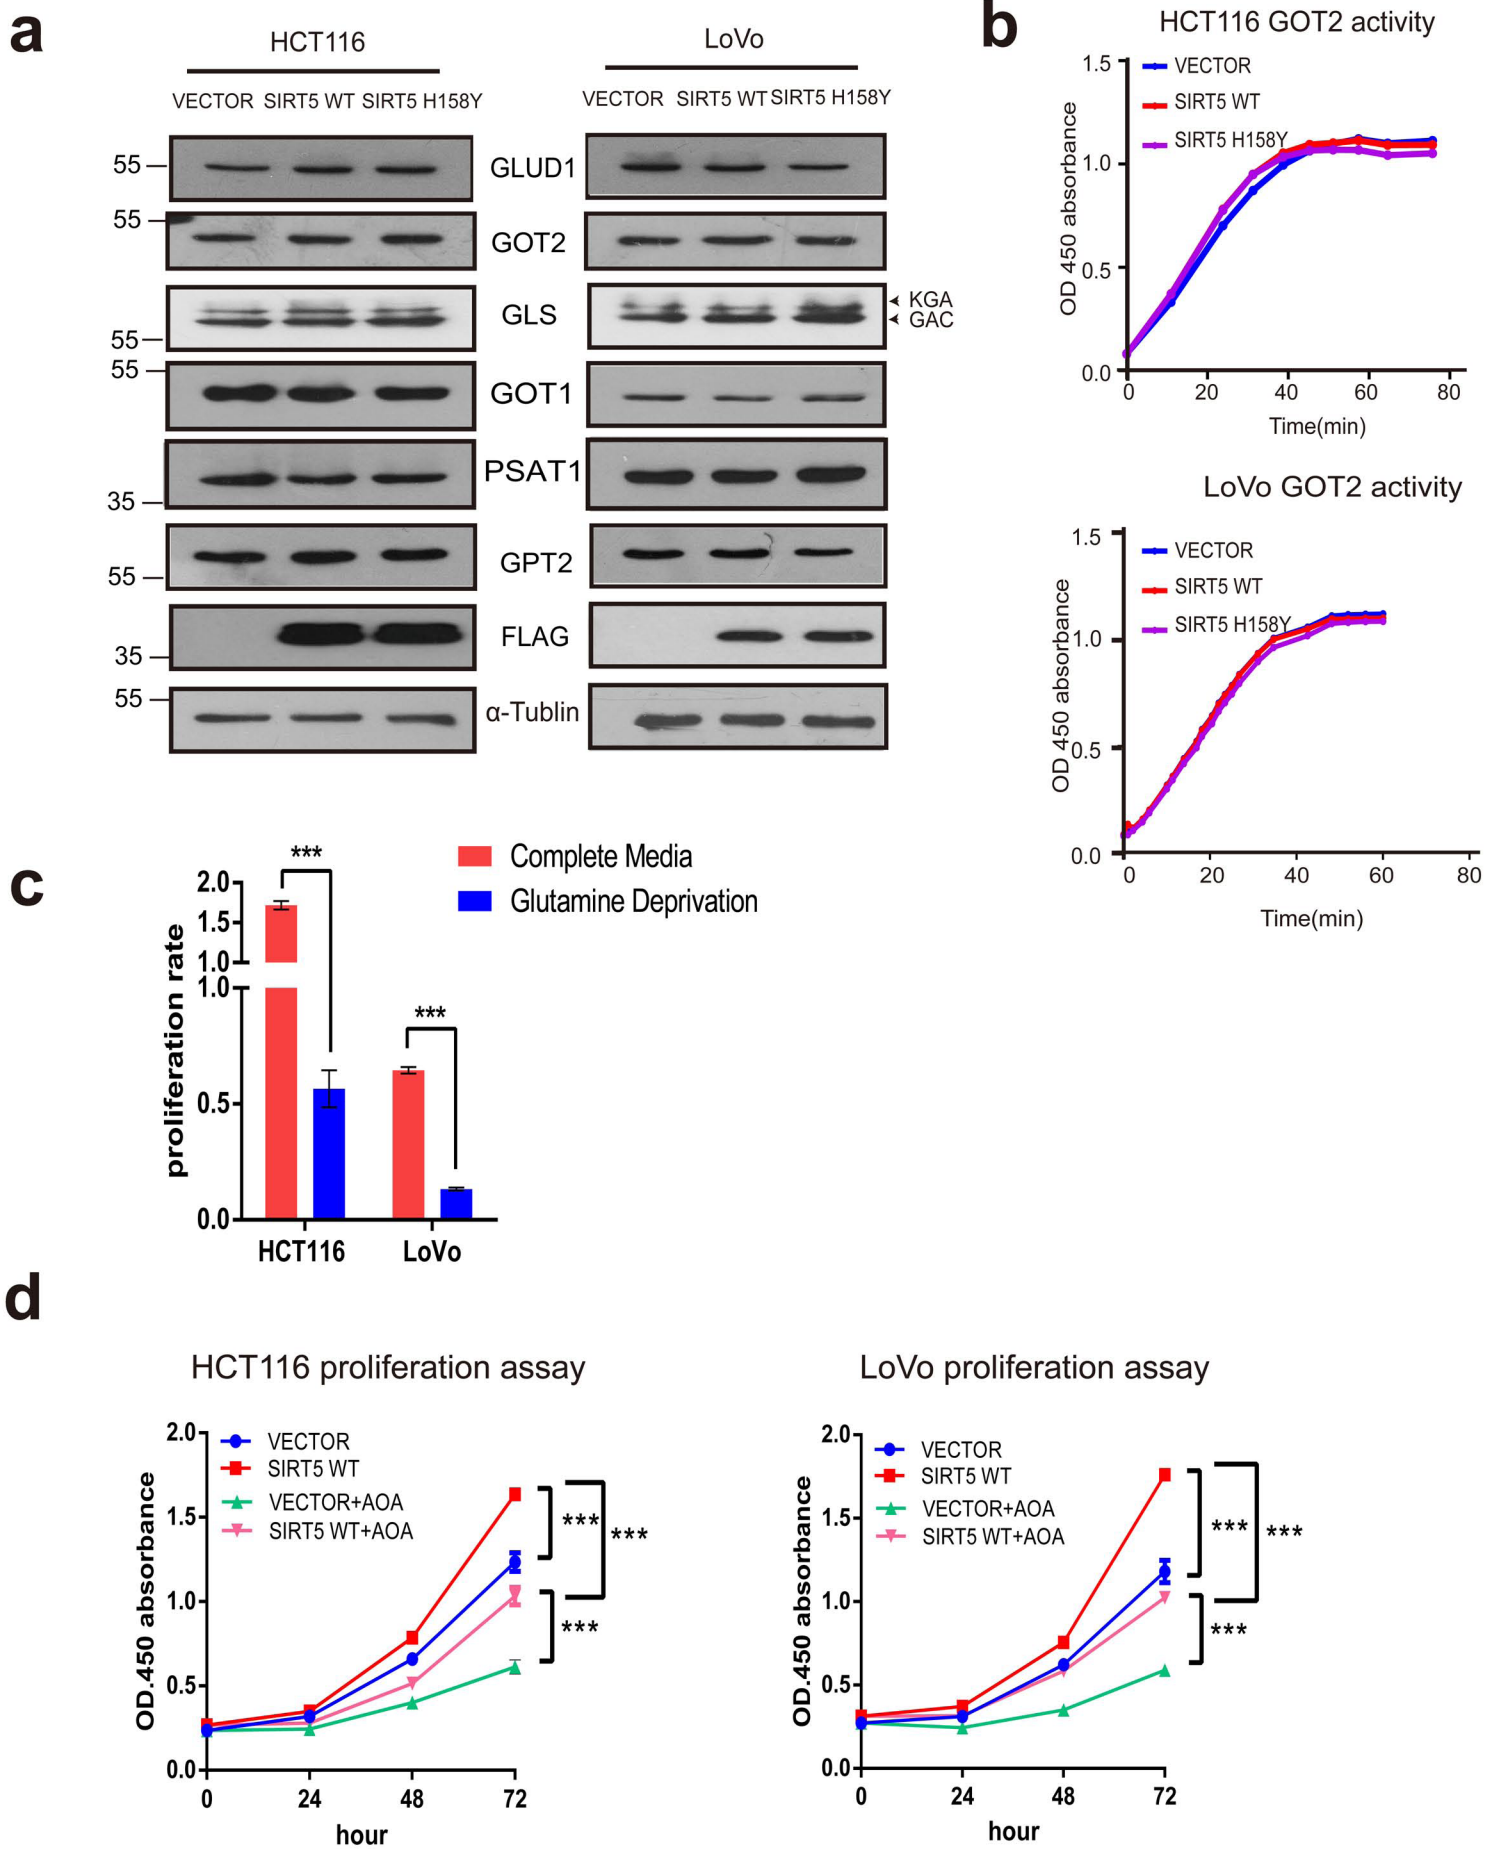

**Supplementary Figure 5.** (a) Western blot showing that SIRT5 WT/H158Y mutation did not change the GLUD1, GOT1/2, GLS (including kidney-type glutaminase (KGA isoform), and glutaminase C (GAC isoform)), PSAT1, and GPT2 protein levels in CRC cells.  $\alpha$ -Tubulin served as the loading control. (b) Representative tracings ( $n = 3$ ) of GOT2 enzyme activity in HCT116 and LoVo cells stably expressing the control vector, SIRT5 WT, or SIRT5 H158Y. The experiments were repeated three times. (c) Proliferation rate of HCT116 and LoVo cells stably expressing the control vector or SIRT5 WT plasmid in complete media or glutamine deprived media. Data are the mean  $\pm$  SD of four independent samples from a representative experiment. Student's t-test.  $***P < 0.001$ . (d) CCK-8 assays of HCT116 and LoVo cells stably expressing the control vector or SIRT5 WT treated with or without the pan-transaminases inhibitor AOA (0.5 mM). ANOVA with Tukey's test. Data are the mean  $\pm$  SD of five independent samples.  $***P < 0.001$ .

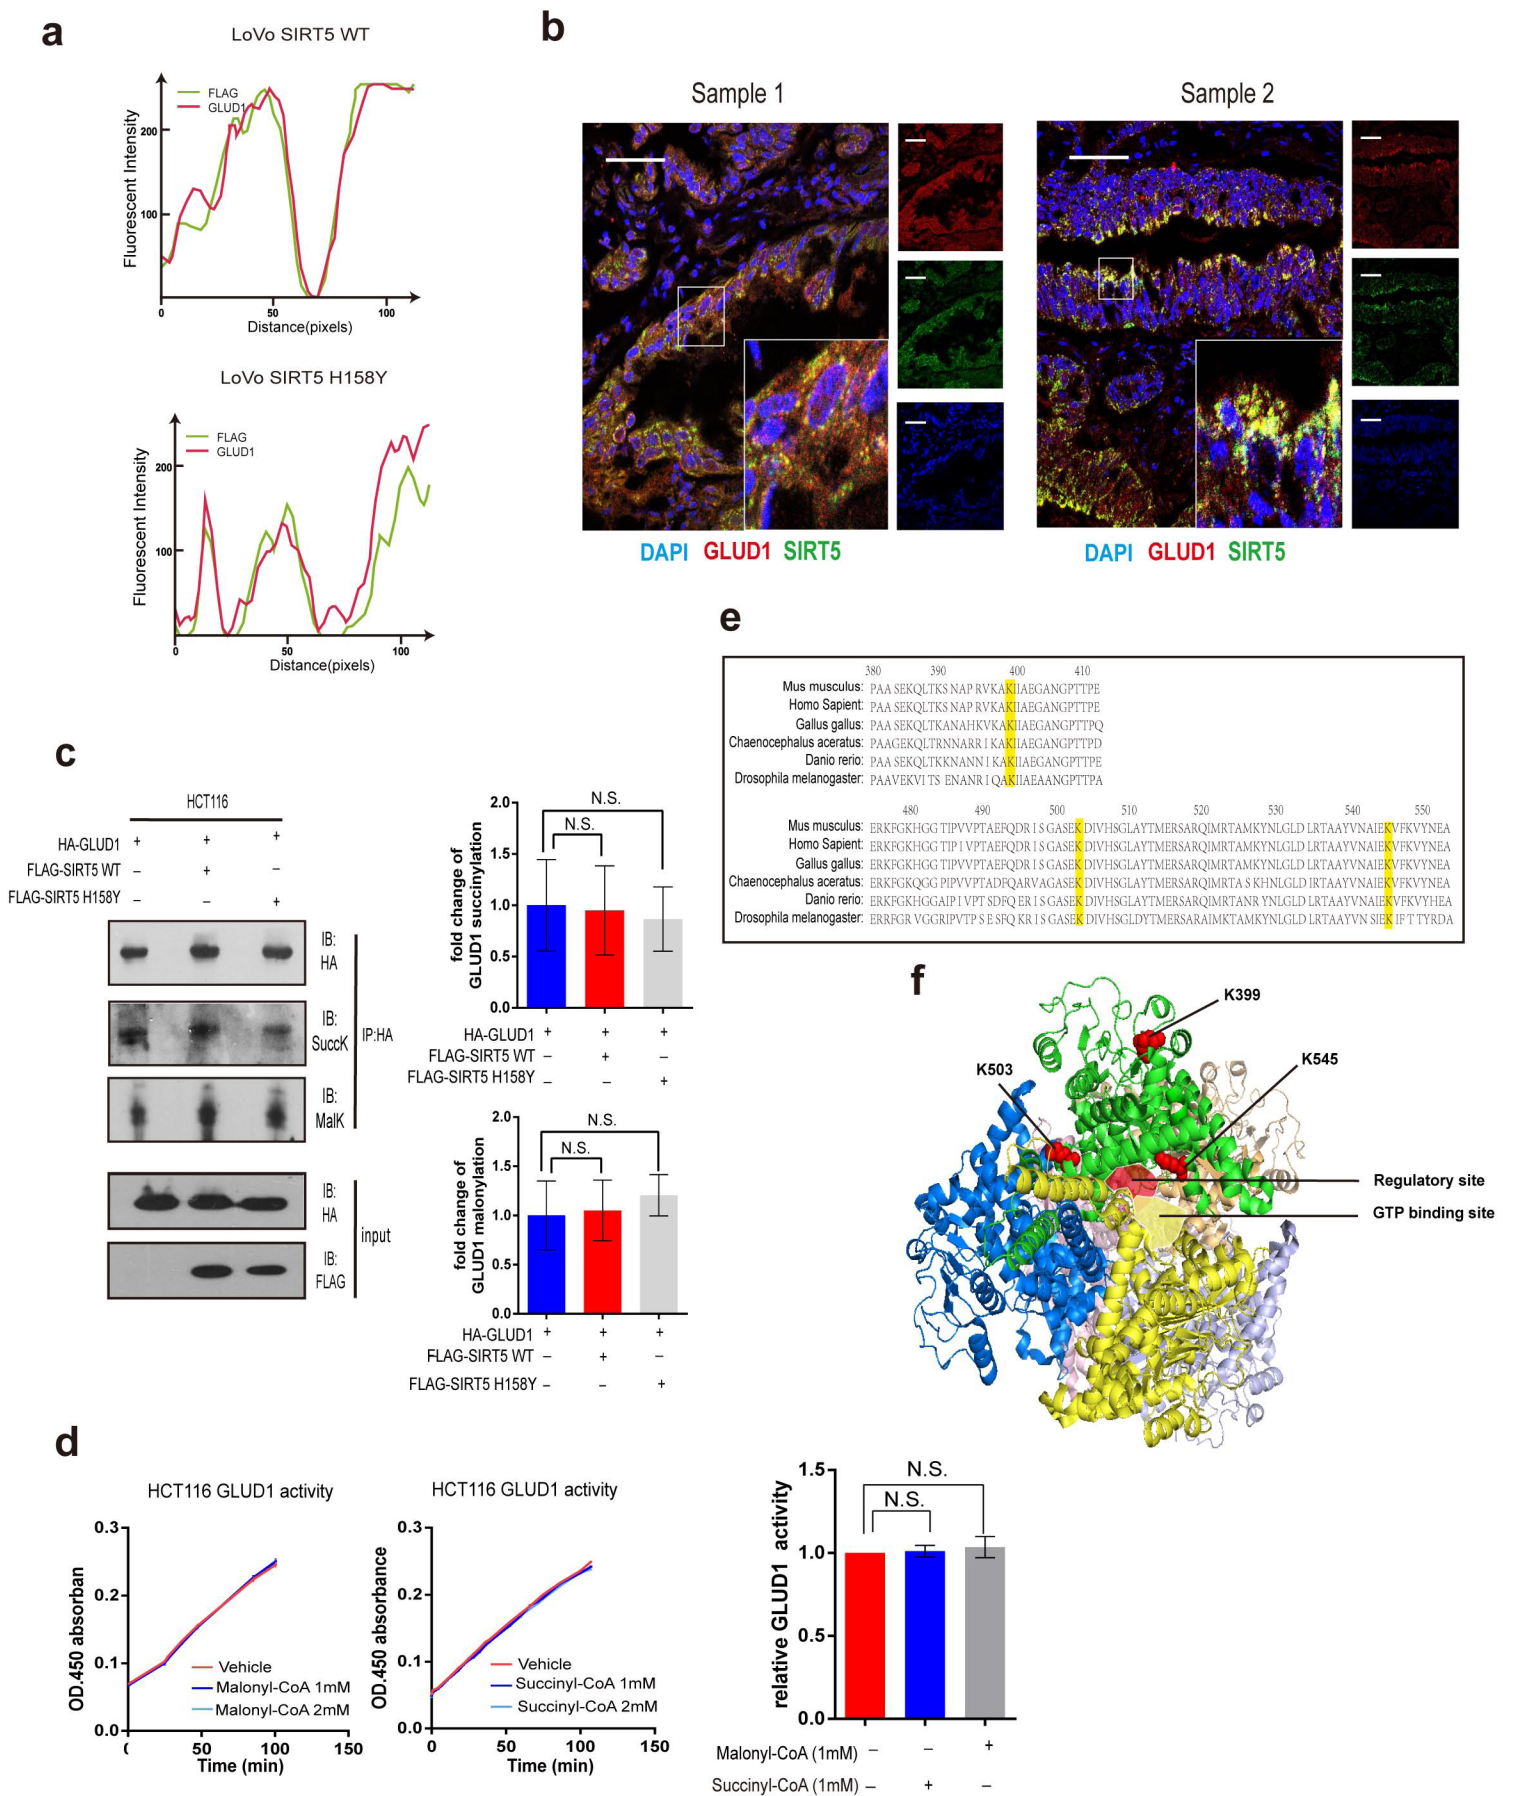

**Supplementary Figure 6.** (a) Fluorescence intensity of FLAG-SIRT5 (green line) and GLUD1 (red line) traced along the white line in LoVo cells using the line profiling function of the Image J software. (b) Immunofluorescence analysis of SIRT5 (green) and GLUD1 (red) expression in CRC tissues; yellow in the merged magnified images (left) indicates SIRT5 and GLUD1 co-localization. Scale bars indicate 50  $\mu$ m. (c) Exogenous GLUD1 proteins were purified by immunoprecipitation in HCT116 cells expressing the control vector, SIRT5 WT, and SIRT5 H158Y. Succinylation (SuccK) and malonylation levels (MalK) of GLUD1 were determined by western blotting. Integrated density values were calculated using Image J. The results are the mean  $\pm$  SD of two independent experiments, and are shown relative to the vector control. ANOVA with Tukey's test. N.S. = not significant for the indicated comparison. (d) HA-Tagged GLUD1 proteins were purified and incubated with different concentrations of succinyl- or malonyl-CoA (0, 1, and 2 mM) at 37°C for 60min. The GLUD1 enzyme activity was then determined. Left, representative images (n=3). Right, quantification of GLUD1 activity. The results are shown as the mean  $\pm$  SD. ANOVA with Tukey's test. N.S. = not significant for the indicated comparison. (e) Sequence alignment of GLUD1 revealed that three lysine residues (K399, K503, and K545) that could be glutarylated are conserved across different species, including human (*Homo sapiens*, NCBI reference number: NP\_005262.1), mouse (*Mus musculus*, NP\_032159.1), chicken (*Gallus gallus*, XP\_015143519.1), blackfinicefish (*Chaenocephalus aceratus*, UniProtKB\_P82264), zebrafish (*Danio rerio*, NP\_955839.2), and fruitfly (*Drosophila melanogaster*, NP\_996274.1). (f) Structure and quaternary conformation of human GLUD1 (PDB ID: 1L1F) simulated from the protein data bank. Each subunit is represented by a different color. Lysine residues (K399, K503, and K545) are indicated with red marks. The GTP binding (yellow) and regulatory (red) sites in one protomer are shown.

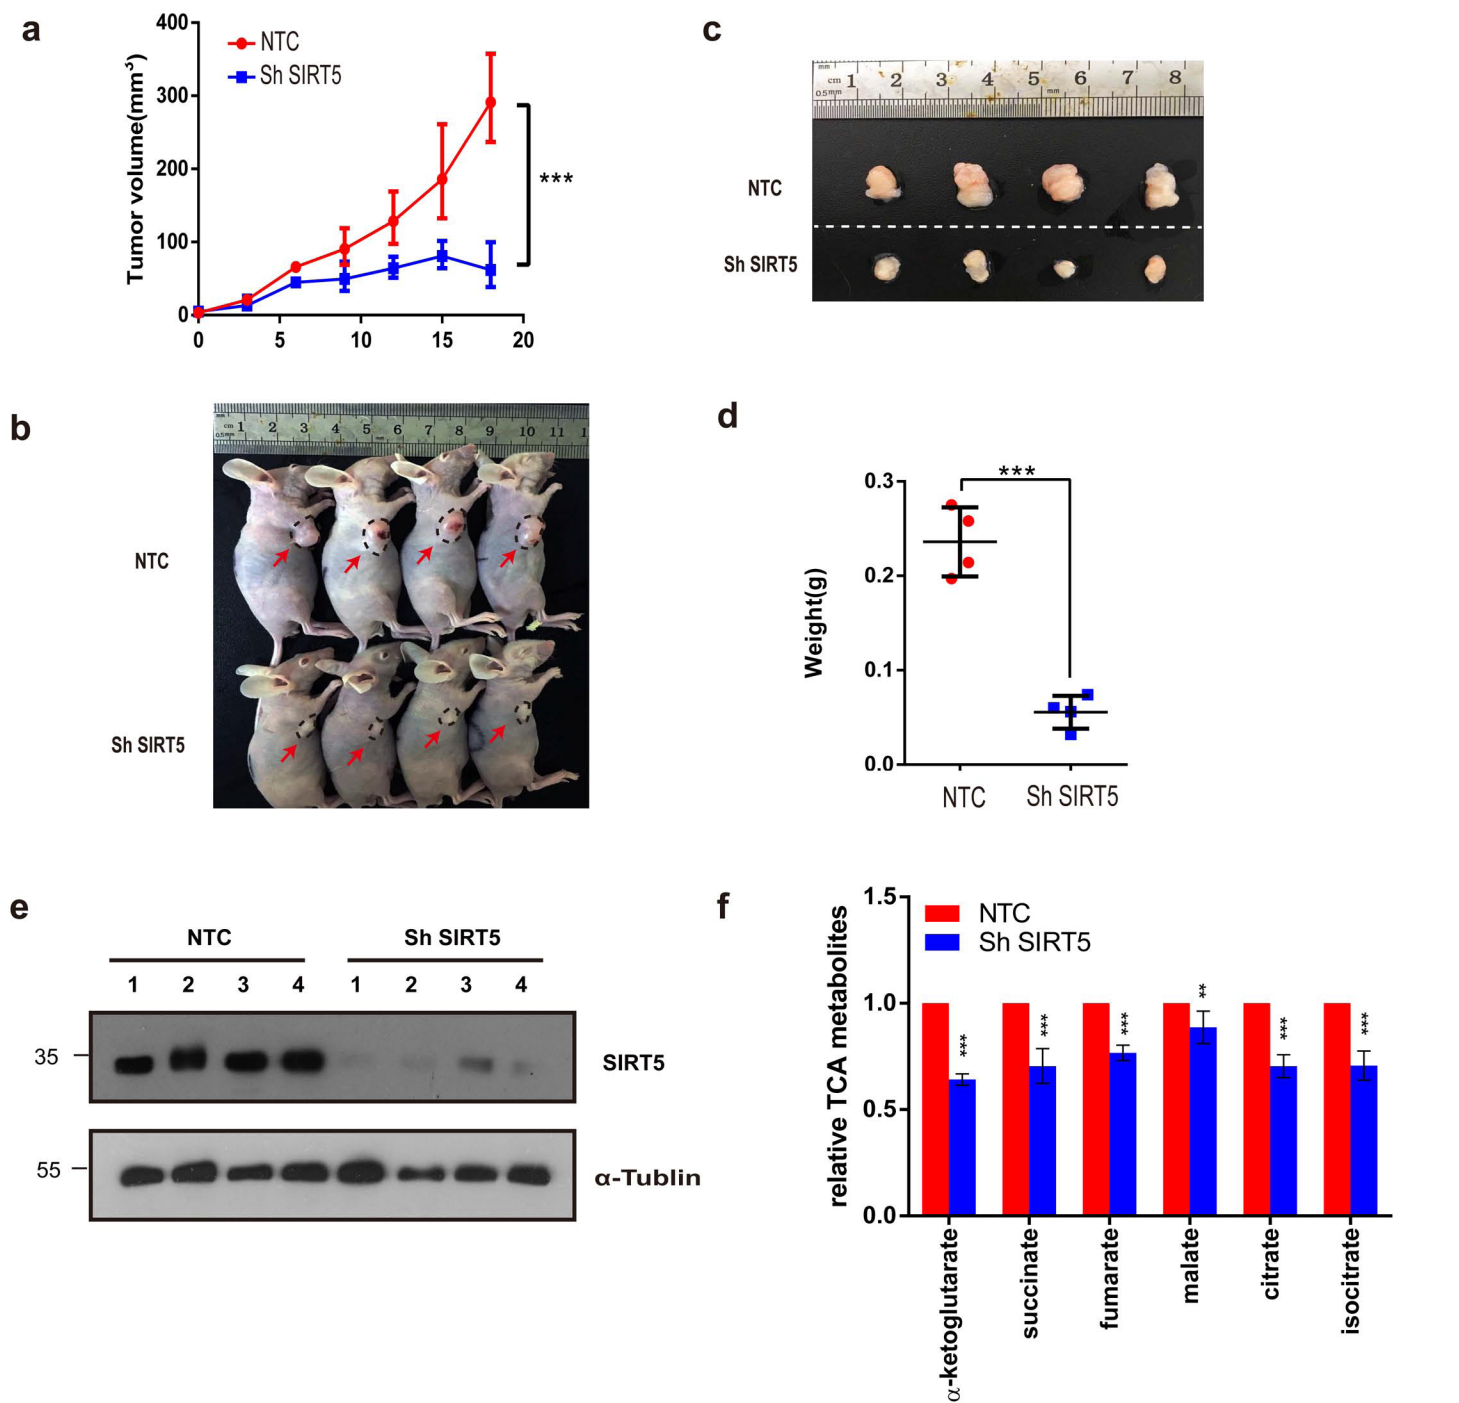

**Supplementary Figure 7.** (a) HCT116 cells stably expressing the non-target control (NTC) shRNA or *SIRT5* shRNA were injected subcutaneously into nude mice (n=4 for each group). Tumor volumes were measured at the indicated time points and the mean tumor volumes were calculated. Student's t-test. \*\*\* $P < 0.001$ . (b-d) At the end of experiment, tumors from the two groups were dissected, photographed (b,c), and weighted. Each dot represents the tumor mass from one mouse (d); n=4 for each group. Student's t-test. \*\*\* $P < 0.001$ . (e) *SIRT5* protein levels and the knockdown efficiency in xenografts were confirmed by immunoblotting. (f) The abundance of  $\alpha$ -KG, succinate, fumarate, malate, citrate and isocitrate in tumor lysates were quantified by GC-MS analysis. Student's t-test. \*\*\* $P < 0.001$ . The results in a, d, f are shown as the mean  $\pm$  SD.

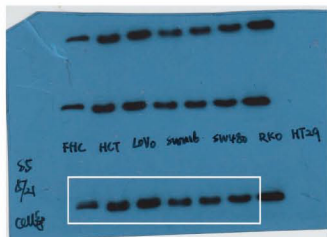

Figure1f SIRT5

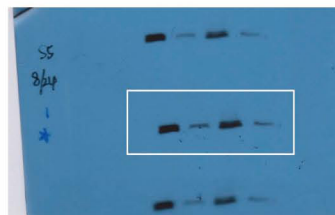

Figure2g SIRT5

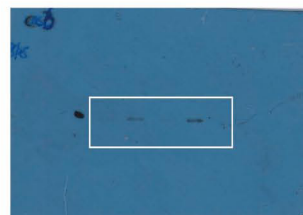

Figure2g cleaved-caspase 6

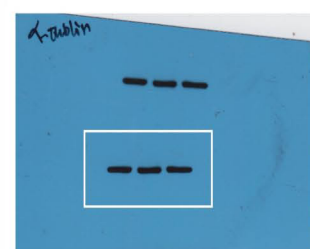

Figure3a α-Tubulin (HCT116)

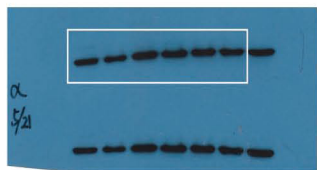

Figure1f α-Tubulin

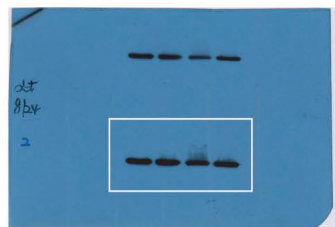

Figure2g α-Tubulin

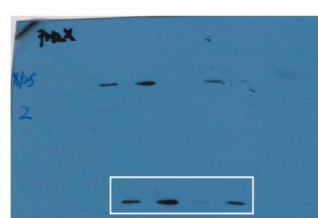

Figure2g γH2AX

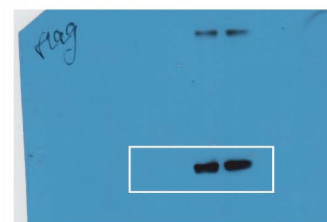

Figure3a FLAG (HCT116)

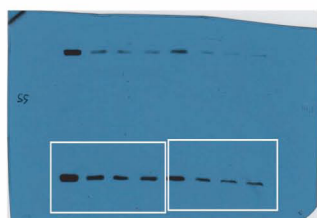

Figure2a and 2b SIRT5

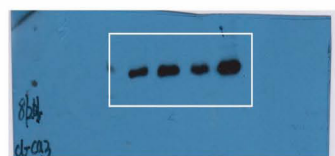

Figure2g cleaved-caspase 3

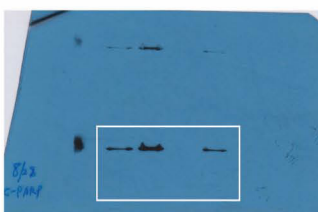

Figure2g cleaved-PARP

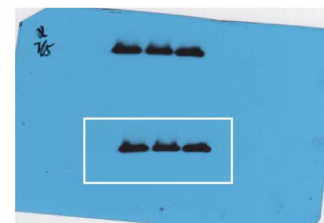

Figure3b α-Tubulin (LoVo)

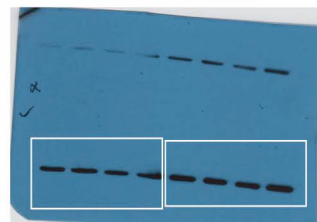

Figure2a and 2b α-Tubulin

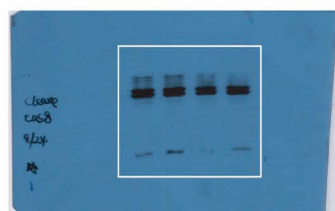

Figure2g cleaved-caspase 8

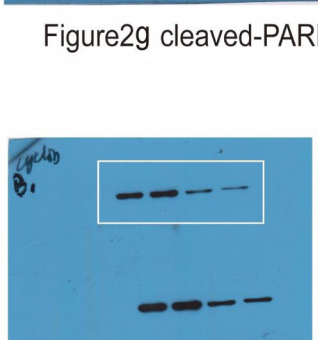

Figure2g cyclin B1

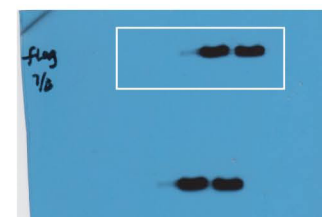

Figure3b FLAG (LoVo)

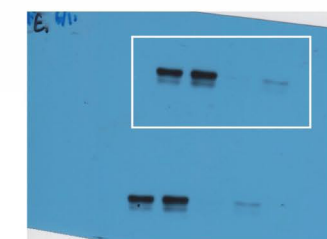

Figure2g cyclin E1

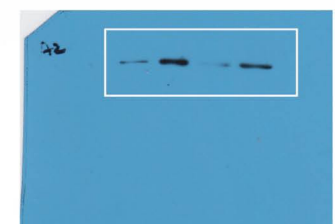

Figure2g cyclin A2

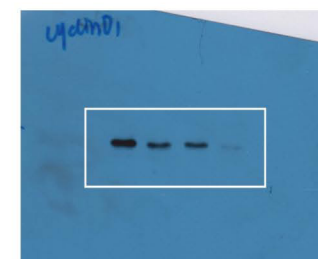

Figure2g cyclin D1

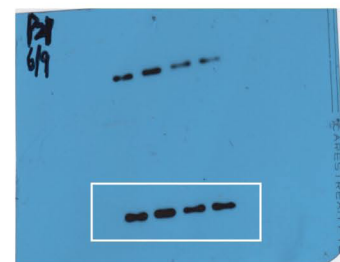

Figure2g p21

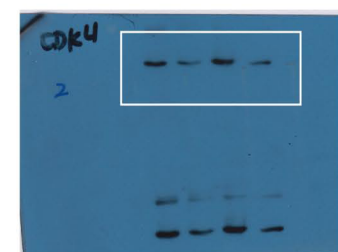

Figure2g CDK4

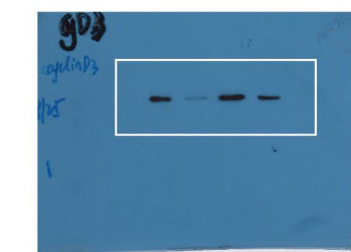

Figure2g cyclin D3

**Supplementary Figure 8.** Uncropped scans of western blots presented in Figure 1, 2 and 3.



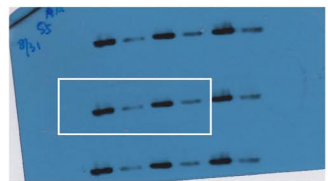

Figure5k SIRT5

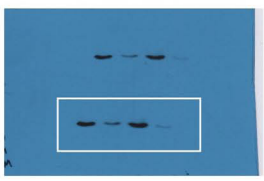

Figure5k SIRT5

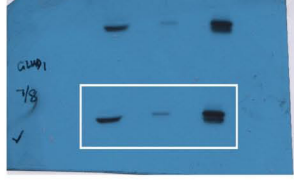

Figure6g GLUD1

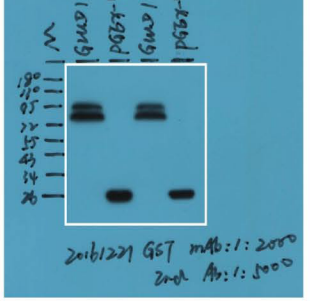

Figure6h GST

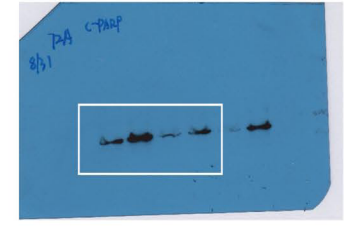

Figure5k cleaved-PARP

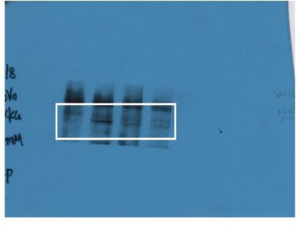

Figure5k cleaved-PARP

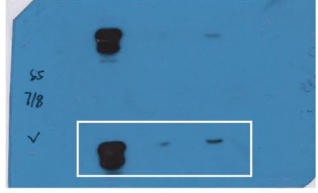

Figure6g SIRT5

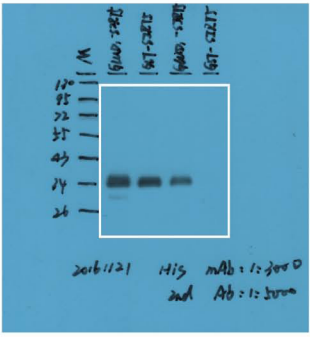

Figure6h HIS

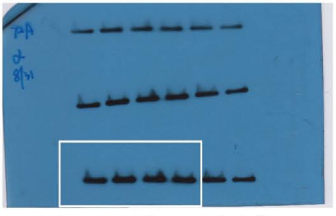

Figure5k alpha-Tubulin

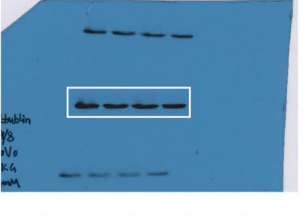

Figure5k alpha-Tubulin

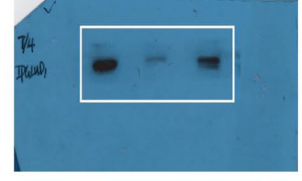

Figure6f GLUD1

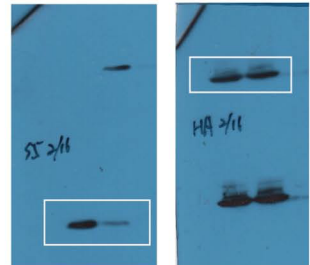

Figure6k SIRT5 input

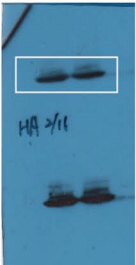

Figure6k HA input

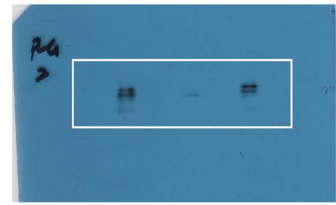

Figure6i GluK

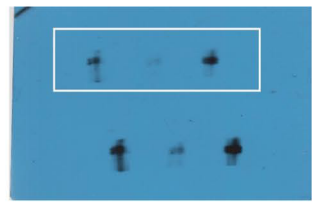

Figure6j GluK

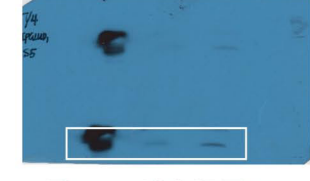

Figure6f SIRT5

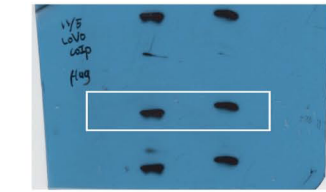

Figure6e FLAG-SIRT5

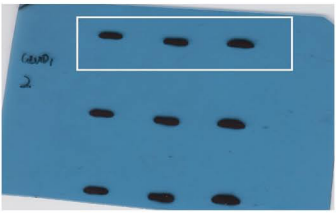

Figure6i HA-GLUD1

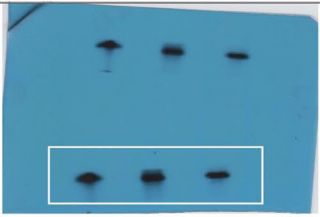

Figure6j HA-GLUD1

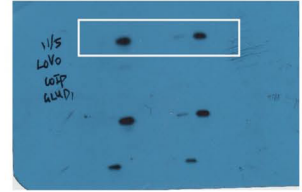

Figure6e GLUD1

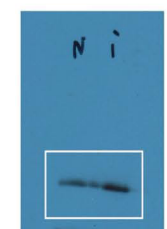

Figure6k GluK

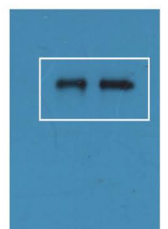

Figure6k HA

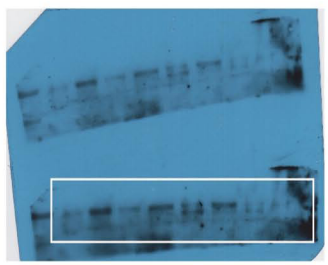

Figure6m GluK

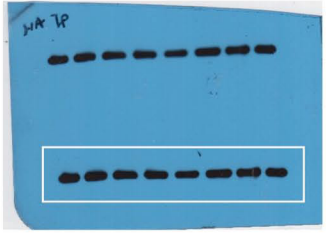

Figure6m HA

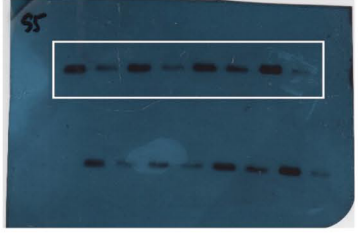

Figure6m SIRT5 input

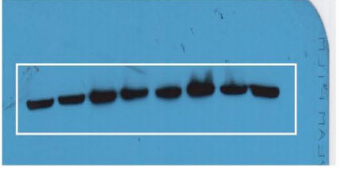

Figure6m alpha-Tubulin input

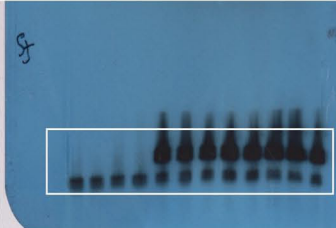

Figure7f SIRT5

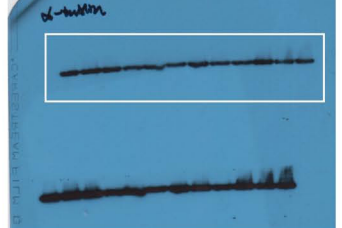

Figure 7f alpha-Tubulin

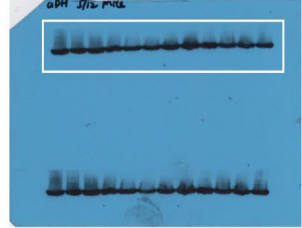

Figure 7f GLUD1

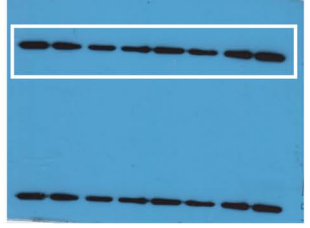

Figure6m HA input

Supplementary Figure 9. Uncropped scans of western blots presented in Figure 5, 6 and 7.

SUPPLEMENTARY TABLES

Supplementary Table 1. Clinicopathological features of SIRT5 expression in patients with CRC

| Clinicopathological features       | Total | SIRT5 expression           |                             | <i>P</i> -value |      |               |
|------------------------------------|-------|----------------------------|-----------------------------|-----------------|------|---------------|
|                                    |       | low<br>No. of patients (%) | high<br>No. of patients (%) |                 |      |               |
| <b>Age (years)</b>                 |       |                            |                             |                 |      |               |
| ≤ 65                               | 40    | 20                         | 50                          | 20              | 50   | <b>0.846</b>  |
| > 65                               | 47    | 25                         | 52.1                        | 23              | 47.9 |               |
| <b>Gender</b>                      |       |                            |                             |                 |      |               |
| Male                               | 46    | 24                         | 52.2                        | 22              | 47.8 | <b>0.839</b>  |
| Female                             | 42    | 21                         | 50                          | 21              | 50   |               |
| <b>Histological grade</b>          |       |                            |                             |                 |      |               |
| I, I-II, II                        | 75    | 40                         | 53.3                        | 35              | 46.7 | <b>0.322</b>  |
| II-III, III, III-IV                | 13    | 5                          | 38.5                        | 8               | 61.5 |               |
| <b>Tumor size (cm<sup>3</sup>)</b> |       |                            |                             |                 |      |               |
| < 20                               | 30    | 20                         | 66.7                        | 10              | 33.3 | <b>0.036*</b> |
| ≥ 20                               | 57    | 25                         | 43.9                        | 32              | 56.1 |               |
| <b>T stage</b>                     |       |                            |                             |                 |      |               |
| T1+T2+T3                           | 62    | 36                         | 58.1                        | 26              | 41.9 | <b>0.038*</b> |
| T4                                 | 26    | 9                          | 34.6                        | 17              | 65.4 |               |
| <b>Lymph node metastasis</b>       |       |                            |                             |                 |      |               |
| Absent                             | 58    | 35                         | 60.3                        | 23              | 39.7 | <b>0.016*</b> |
| Present                            | 30    | 10                         | 33.3                        | 20              | 66.6 |               |
| <b>Distant metastasis</b>          |       |                            |                             |                 |      |               |
| Absent                             | 85    | 44                         | 51.8                        | 41              | 48.2 | <b>0.53</b>   |
| Present                            | 3     | 1                          | 33.3                        | 2               | 66.7 |               |
| <b>AJCC stage</b>                  |       |                            |                             |                 |      |               |
| 1-2                                | 56    | 35                         | 62.5                        | 21              | 37.5 | <b>0.005*</b> |
| 3-4                                | 32    | 10                         | 31.3                        | 22              | 68.8 |               |

\* Chi-square test was used for all comparisons and *P* values less than 0.05 were accepted as statistically significant.

**Supplementary Table 2. List of metabolites found to be differentially regulated upon *SIRT5* knockdown**

| <b>Compounds-M.T. (min)</b>            | <b>VIP</b> | <b>P-value</b> | <b>Fold Change</b> |
|----------------------------------------|------------|----------------|--------------------|
| cholesterol-35.2847                    | 1.234862   | 0.043841       | 0.10494            |
| xanthosine-26.2209                     | 1.718701   | 0.00166        | 0.000421           |
| uracil-9.95633                         | 1.907835   | 0.000158       | 2.3822             |
| trehalose-6-phosphate-26.7863          | 1.297544   | 0.03231        | 0.56504            |
| threonic acid-13.9835                  | 2.211334   | 2.60E-09       | 1.5803             |
| taurine-24.9349                        | 1.25529    | 0.039796       | 2.491              |
| succinic acid-9.52320                  | 2.088121   | 2.82E-06       | 0.73654            |
| stearic acid-27.2551                   | 1.404573   | 0.018031       | 0.60599            |
| scopoletin-8.12380                     | 1.338511   | 0.026103       | 5.5117             |
| ribulose-5-phosphate-21.6267           | 1.358399   | 0.023434       | 0.25338            |
| prostaglandin A2-35.2049               | 1.519094   | 0.008682       | 0.60455            |
| phosphate-8.99122                      | 1.452343   | 0.013495       | 2.746              |
| phloroglucinol-25.1636                 | 1.246637   | 0.041474       | 20.189             |
| palmitoleic acid-23.9170               | 1.935538   | 0.0001         | 4.75E-05           |
| palmitic acid-24.3803                  | 1.363547   | 0.022778       | 0.65635            |
| O-phosphonothreonine-10.777            | 1.580557   | 0.005539       | 1.7632             |
| N-ethylglycine-7.94414                 | 1.661498   | 0.002839       | 0.000145           |
| myristic Acid-20.4625                  | 1.687964   | 0.002231       | 0.5213             |
| L-malic acid-12.8651                   | 1.824888   | 0.000507       | 0.795919           |
| L-4-hydroxyphenylglycine-31.0229       | 1.99215    | 3.43E-05       | 12.211             |
| inosine 5'-monophosphate-24.5585       | 1.37623    | 0.021221       | 0.19532            |
| heptadecanoic acid-25.956              | 1.61386    | 0.004256       | 0.48048            |
| guanosine-31.8341                      | 1.80781    | 0.000626       | 1.5799             |
| glycocyanine-14.8205                   | 1.754645   | 0.001146       | 6.8403             |
| glycerol-29.7549                       | 1.850201   | 0.000365       | 0.033515           |
| glucose-6-phosphate-28.0456            | 1.325286   | 0.028          | 0.6125             |
| galactonic acid-22.6369                | 2.049631   | 8.80E-06       | 1.7758             |
| fumaric acid-10.1864                   | 1.609727   | 0.004402       | 0.846491           |
| Fructose 2,6-biphosphate degr -17.3424 | 1.439389   | 0.014627       | 0.36851            |
| ethyl cinnamate-14.3353                | 1.459894   | 0.012866       | 2.7611             |
| erythrose 4-phosphate-23.2727          | 1.696271   | 0.002063       | 9.67E-05           |
| D-talose-21.6717                       | 1.820421   | 0.000536       | 0.37393            |
| dithioerythritol-9.69934               | 1.402539   | 0.018247       | 0.62219            |
| diglycerol-29.4922                     | 2.257292   | 3.55E-14       | 5.20E-05           |
| D-fructose 1,6-bisphosphate-29.0498    | 1.853348   | 0.00035        | 0.59965            |
| citric acid-19.7808                    | 2.114867   | 1.08E-06       | 0.671272           |
| beta-mannosylglycerate-22.9889         | 1.589579   | 0.005165       | 0.45066            |
| beta-glutamic acid-13.3293             | 1.235691   | 0.043671       | 1.6805             |
| asparagine-7.60792                     | 1.733432   | 0.001431       | 0.49548            |
| alpha-ketoglutaric acid-14.1984        | 1.300221   | 0.031874       | 0.33185            |

|                                        |          |          |          |
|----------------------------------------|----------|----------|----------|
| allo-inositol-23.5860                  | 2.042224 | 1.07E-05 | 1.8825   |
| adenosine 5-monophosphate-34.9312      | 1.365912 | 0.022481 | 0.48234  |
| adenine-20.7409                        | 1.885077 | 0.000223 | 1.5238   |
| aconitic Acid-18.3703                  | 2.072042 | 4.66E-06 | 0.727932 |
| 6-phosphogluconic acid-28.6589         | 1.682535 | 0.002347 | 0.48437  |
| 5-aminoimidazole-4-carboxamide-7.45383 | 1.475213 | 0.01166  | 0.61763  |
| 5,6-dihydrouracil-12.7036              | 1.700998 | 0.001972 | 1.5439   |
| 4-nitrocatechol-21.4643                | 1.770195 | 0.000967 | 0.11501  |
| 3-phosphoglycerate-17.9796             | 1.959888 | 6.48E-05 | 2.4178   |
| 3-hydroxybutyric acid-13.1618          | 1.673736 | 0.002544 | 0.1971   |
| 1-hexadecanol-22.6925                  | 1.939937 | 9.28E-05 | 0.000124 |

---

Significantly different metabolites were identified by a combination of two methods:  $P < 0.05$  by t-tests, and Variable Importance in Projection (VIP)  $> 1$  by partial least squares discriminant analysis (PLS-DA).

**Supplementary Table 3. Summary of previously identified lysine acylation of enzymes involved in glutamine metabolism**

| Reference                       | sample source     | protein | lysine modifications (sites)                                                               |                                                                  |      |
|---------------------------------|-------------------|---------|--------------------------------------------------------------------------------------------|------------------------------------------------------------------|------|
|                                 |                   |         | Ksucc                                                                                      | Kmal                                                             | Kglu |
| Park J, 2014 <sup>[23]</sup>    | mouse MEF         | GLUD1   | 147, 183, 211, 390, 503, 527, 545                                                          |                                                                  |      |
|                                 |                   | GLS     | 135, 126                                                                                   |                                                                  |      |
| Du J, 2011 <sup>[21]</sup>      | bovine liver      | GLUD1   | 84, 109, 162,363, 414, 457, 503, 527                                                       | 503, 457, 527                                                    |      |
|                                 |                   | GOT2    | 309                                                                                        |                                                                  |      |
| Rardin MJ, 2013 <sup>[22]</sup> | mouse liver       | GLUD1   | 480, 90, 457, 211, 365, 545, 363, 346, 527, 162, 110, 548, 503, 84, 187, 415, 68, 200, 191 |                                                                  |      |
|                                 |                   | GOT2    | 185, 73, 309, 296, 227, 396, 159, 345, 234, 313, 302, 333, 90, 404, 122, 387               |                                                                  |      |
| Tan M, 2014 <sup>[25]</sup>     | mouse liver       | GLUD1   |                                                                                            | 503, 527, 84, 90, 390, 363, 399, 545, 480                        |      |
|                                 |                   | GOT2    |                                                                                            | 90, 59, 302, 296, 234, 227, 82, 404, 73, 363, 122, 309, 338, 396 |      |
| Nishida Y, 2015 <sup>[24]</sup> | mouse liver       | GLUD1   |                                                                                            | 90,84, 346, 503                                                  |      |
|                                 |                   | GOT2    |                                                                                            | 296, 338, 404                                                    |      |
| Colak G, 2015 <sup>[34]</sup>   | Human fibroblasts | GLS     |                                                                                            | 245                                                              |      |
| Weinert BT,2013 <sup>[33]</sup> | E. coli           | GLUD    | 16, 184, 276                                                                               |                                                                  |      |
|                                 |                   | GOT     | 116, 37, 42, 51, 276, 236, 134, 50                                                         |                                                                  |      |
|                                 | human Hela cells  | GLUD1   | 191, 503, 211,183, 346, 527, 457, 545, 415                                                 |                                                                  |      |
|                                 |                   | GLS     | 164, 311                                                                                   |                                                                  |      |
|                                 | Mouse liver       | GLUD1   | 187, 181, 211, 84, 200, 503, 457, 545, 548, 527, 162, 352, 415, 390, 90                    |                                                                  |      |
|                                 |                   | GOT2    | 90, 122, 302, 309, 73, 82, 159, 404, 234, 338, 345, 396, 227, 363, 185                     |                                                                  |      |
|                                 |                   | GLS     | 244, 329, 515, 172                                                                         |                                                                  |      |

Abbreviation: Ksucc: Lysine succinylation, Kglu: Lysine glutarylation, Kmal: Lysine malonylation
